# Supplementary material for: Reducing hydrated protons co-intercalation to enhance cycling stability of CuV2O5 nanobelts: a new anode material for aqueous lithium ion batteries
Source: Royal Society of Chemistry journal article supplement (doi:10.1039/c2jm32786d), 2012-01-01
Supplement: c2jm32786d.pdf [file c2jm32786d.pdf]

## Electronic supplementary information

# Reducing hydrated protons co-intercalation to enhance cycling stability of $\text{CuV}_2\text{O}_5$ nanobelts: A new anode material for aqueous lithium ion batteries

Liangfei Bai, Jinbao Zhu, Xiaodong Zhang, Yi Xie\*

*Nano-materials and Nano-chemistry, Hefei National Laboratory for Physical Sciences at Microscale, University of Science and Technology of China, Hefei, Anhui 230026, P.R. China*

Fax: +86-551-3603987, Tel: +86-551-3603987, E-mail: [yxie@ustc.edu.cn](mailto:yxie@ustc.edu.cn)

### S1. XRD pattern of the as-prepared $\text{CuV}_2\text{O}_5$ nanobelts after anneal

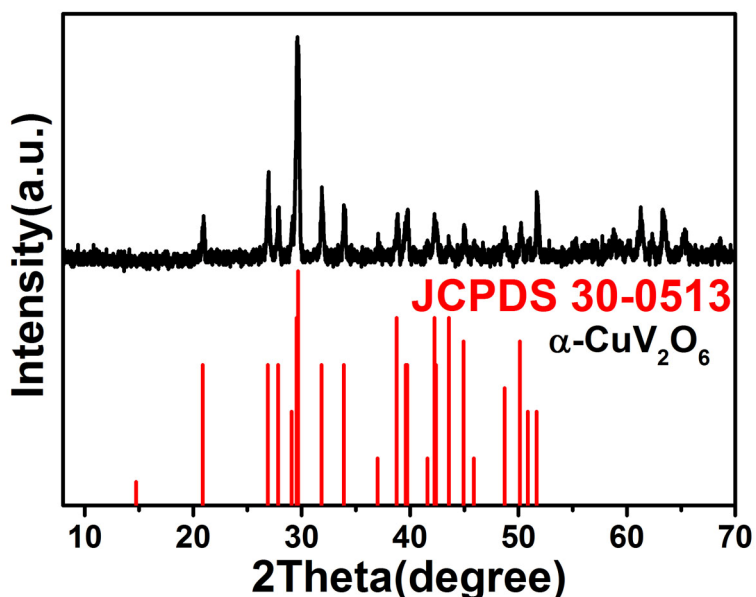

**Figure S1** XRD pattern of the as-prepared  $\text{CuV}_2\text{O}_5$  nanobelts annealed at 500 °C for 3h in atmosphere

The XRD pattern of the product annealed at 500 °C for three hours in atmosphere can be indexed to pure  $\alpha\text{-CuV}_2\text{O}_6$  (JCPDS 30-0513) without any feature peaks of

$V_2O_5$  or  $CuO$ , confirming the primary product of the hydrothermal reaction is pure  $CuV_2O_5$ . The corresponding chemical equation can be described as follows:

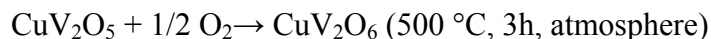

Otherwise:

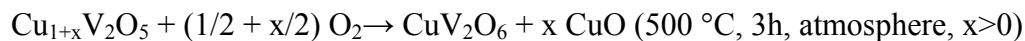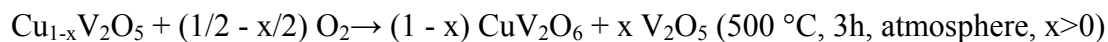

## S2. Structure model of the $CuV_2O_5$ nanobelt

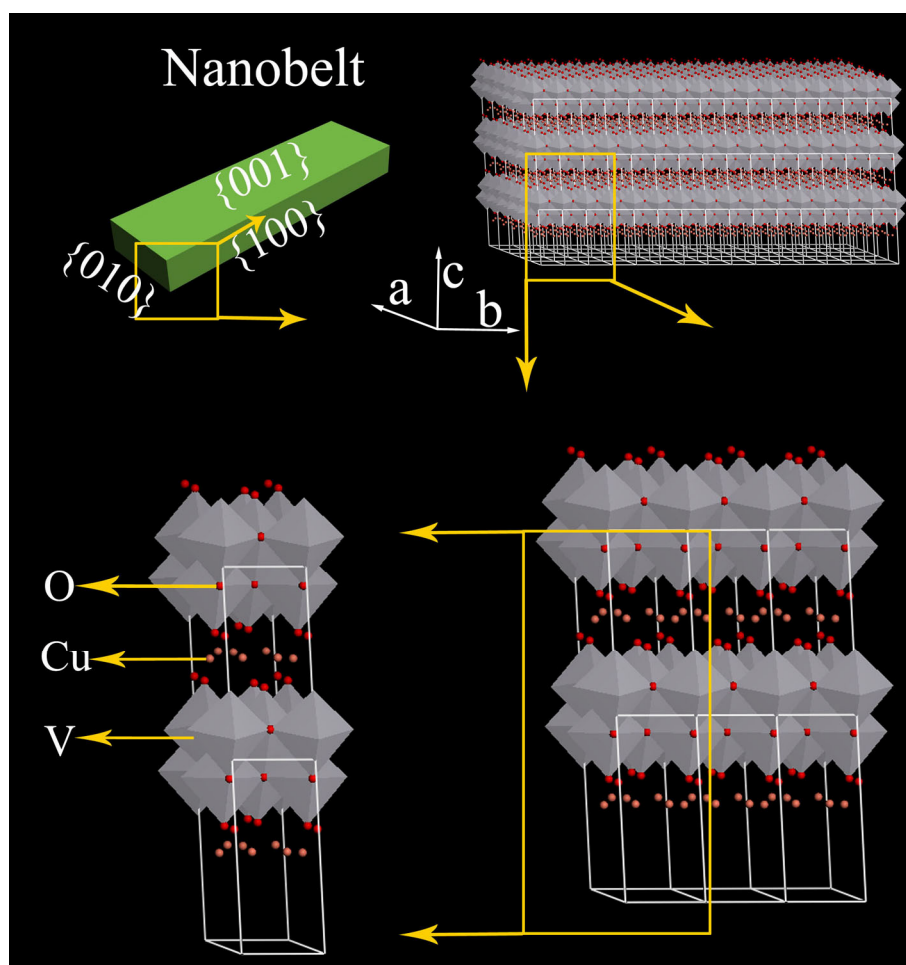

**Figure S2** Corresponding structural model of the  $CuV_2O_5$  nanobelt.

This schematic model shows that the layered structure  $CuV_2O_5$  nanobelt is prefer to expose  $\{001\}$  facets, which is in well accord with the SAED result and the strongest  $(003)$  peak in the XRD pattern.

### S3. Typical discharge curve of $\text{CuV}_2\text{O}_5$ at constant temperature

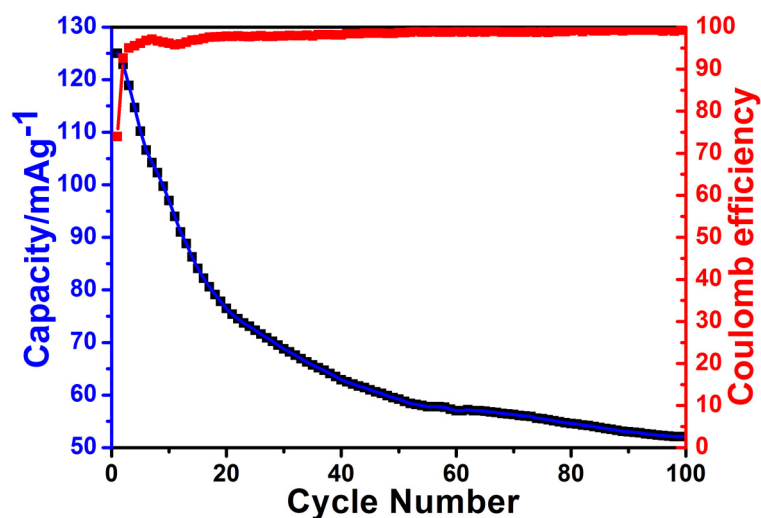

**Figure S3** Discharge capacity and coulomb efficiency versus cycle number curves for as prepared nanobelt structure  $\text{CuV}_2\text{O}_5/\text{LiMn}_2\text{O}_4$  cell between 1.6 and 0.5 V, the aqueous solution including 5 M  $\text{LiNO}_3$  and 0.001 M  $\text{LiOH}$  (pH~6.5), the test apparatus were placed in a constant temperature water bath of 25 °C.

In the constant temperature test, the curve is basically smooth and the wave of the capacity disappeared, confirming the wave resulted from the wave of the temperature. Furthermore, we calculated the time interval between the two nearest wave-crests/wave-troughs in the waved discharge cures in Figure 8a and most were about 24 h, just a daytime and night time.

### S4. Ex-situ XRD and XPS of O 1s of the anode at pH~8.5

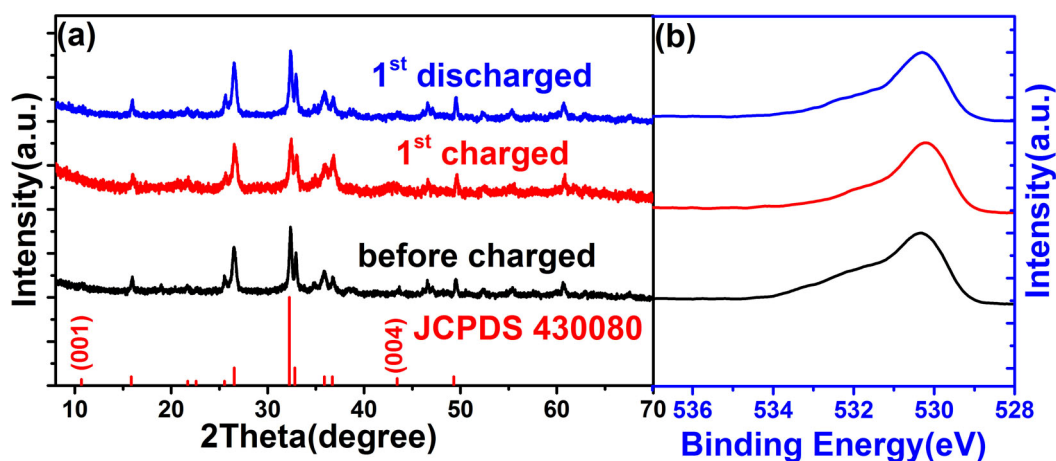

**Figure S4** Ex-situ (a) X-ray diffraction and (b) XPS of O 1s of the nanobelt structure  $\text{CuV}_2\text{O}_5$  anode at different charge/discharge stages, and the  $\text{CuV}_2\text{O}_5/\text{LiMn}_2\text{O}_4$  cell was charged/discharged between 1.6 and 0.5 V, the aqueous solution including 5 M  $\text{LiNO}_3$  and a certain amount of  $\text{LiOH}$  (pH~8.5).

The ex-situ test results at pH~8.5 reveal the (001) and (004) peaks in the XRD patterns and the peak of O1s in the XPS spectra at 531.9 eV didn't obviously strengthen after the charge process, indicating that the hydrated protons didn't obviously insert into the layered structure of  $\text{CuV}_2\text{O}_5$  electrode during the charge process at pH~8.5, which was quite different from the situation at pH~6.5.

#### S5. The XRD patterns of the $\text{CuV}_2\text{O}_5$ anode after 100 cycles

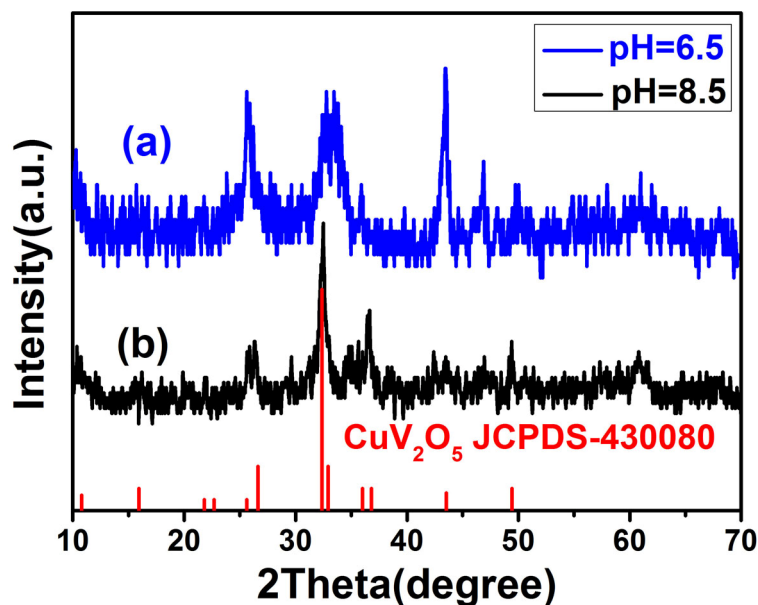

**Figure S5** XRD pattern of the as-prepared nanobelt structure  $\text{CuV}_2\text{O}_5$  anode after 100 cycles tests: (a) pH~6.5, (b) pH~8.5

The XRD patterns of the  $\text{CuV}_2\text{O}_5$  after 100 cycles show that the structure of  $\text{CuV}_2\text{O}_5$  at pH~8.5 remained unchanged, while at pH~6.5 there took place some irreversible phase collapse with some amorphization, which would take responsibility for the bad cycling performance at lower pH values.

#### S6. The XRD patterns of the $\text{CuV}_2\text{O}_5$ using different copper sources

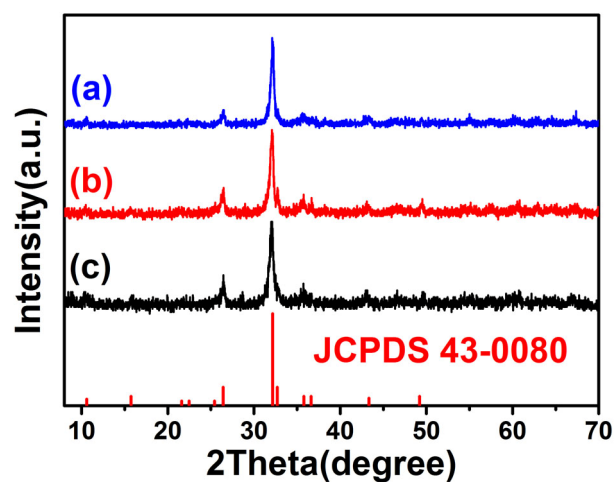

**Figure S6** XRD patterns of the  $\text{CuV}_2\text{O}_5$  nanobelt using various soluble copper sources: (a)  $\text{Cu}(\text{NO}_3)_2$ , (b)  $\text{Cu}(\text{CH}_3\text{COO})_2$ , (c)  $\text{CuCl}_2$ .

The XRD patterns of the  $\text{CuV}_2\text{O}_5$  using various soluble copper sources show that all the products are pure monoclinic  $\text{CuV}_2\text{O}_5$  (JCPDS No. 43-0080), indicating that the  $\text{Cu}^{2+}$  cations are critical for the formation of  $\text{CuV}_2\text{O}_5$ , while the anion species seems no effect on the final product.
